# Supplementary material for: Domain Swapping between AtACS7 and PpACL1 Results in Chimeric ACS-like Proteins with ACS or Cβ-S Lyase Single Enzymatic Activity
Source: MDPI journal article supplement (doi:10.3390/ijms24032956), 2023-02-03
Supplement: s1 [file s1]

```

AtACS7      MGLPLMMERSSNNNNVELSRVAVSD----THGEDSPYFAGWKAYDENPYDESHNPSGVIQ
PpACL1      --MPMNGDTKDGEFNLKCGRTSLSTRGRRALAPFSPYIKAVNEAKKNPWSL--SNPEGYFV
R10         MGLPLMMERSSNNNNVELSRVAVSD----THGEDSPYFAGWKAYDENPYDESHNPSGVIQ
           :*: : . . . : * : . * : : : : : : : : : : : : : : : : : : : : : : : : : : : :

AtACS7      MGLAENQVSFDLLETYLEKKNPESGMWGSKGAPGFRENALFQDYHGLKTFRQAMASFMEQ
PpACL1      MATAESILSFDLVHDKIRSCREVPA-----TVGLYGNFRGGERLRNAISRMMER
R10         MGLAENQVSFDLLETYLEKKNPESGMWGSKGAPGFRENALFQDYHGLKTFRQAMASFMEQ
           * . * . : * * * : . : . . : : : : : : : : : : : : : : : : : : : : : : : : : :

AtACS7      IRGGKARFDPDRIVLTAGATAANELLTFFILADPNDAALLVPTPYYPGFDRDLRWRTGVKIV
PpACL1      TFMG--VEVDPSHICISSGVTAVIDLFFATCNPGDGLIPAPYFFAFDNDMSIRNEVIPI
R10         IRGGKARFDPDRIVLTAGATAANELLTFFILADPNDAALLVPTPYYPGFDRDLRWRTGVKIV
           * . . . * . : * : : * . * : : : : : : : : : : : : : : : : : : : : : : : :

AtACS7      PIHCDSSNHQITPEALESAYQTARDANIRVRGVLTNPSPNLGATVQKKVLEDDLDFCV
PpACL1      PVQPTDTRTYIPTVHEMEEAVLAAESKGIARMMLLVNTPGNPLGTLYPEATLKELLWAV
R10         PIHCDSSNHQITPEALESAYQTARDANIRVRGVLTNPSPNLGATVQKKVLEDDLDFCV
           * : : . . : * . : * . : * . . * . * : : * * * . * * * : : . : * * * : : *

AtACS7      RKNIHVLVSDEIYSGSVFHASE--FTSVAEIVE-----NIDDVSVKERVHIVYSLSKDLG
PpACL1      KRGLHVLVSDEIYANSKFGPSVDEFVSMKVTKNAVMEGLLSAETAELVHTAYGMSKDFG
R10         RKNIHVLVSDEIYSGSVFHASE--FTSVAEIVE-----NIDDVSVKERVHIVYSLSKDLG
           : : . : * : : * * * : : * * : : : : : : : : : : : : : : : : : : : : : : : :

AtACS7      LPGFRVGTIYSYNDNVVRTARFMSSFTLVSSQTQHMLASMLSDEEFTEKYIRINRERLRR
PpACL1      MNGFRVGLHTKNKDLEFWQNMGMFAAVSNDTQHMLAIMLEDENFVDKYVKENNRRLKK
R10         LPGFRVGTIYSYNDNVVRTARFMGMFAAVSNDTQHMLASMLSDEEFTEKYIRINRERLRR
           : * * * * : : : * . : : . : . * . * : : * * : * * * : * * : * * : : : * . * : :

AtACS7      RYDTIVEGLKKAGIECLKGNAGLFCWMNLGFLLEKKTGDGELQLWDVILKELNLNISPVS
PpACL1      SYELLTKSFEEANLRYMPACAAMFCWLDLKSLLTEPTFTAEDNLWKEILDECRIVLTPGQ
R10         RYDTIVEGLKKAGIECLKGNAGLFCWMNLGFLLEKKTGDGELQLWDVILKELNLNISPVS
           * : : : : : * . . : . * . : * * * : * * : * . * : * * . * . : : : * .

AtACS7      SCHCSEVGWFRVCFANMSENTLEIALKRIHEFMDRRRRF-----
PpACL1      ACHYAEPGFFRVCYASMAPASLEIACARLTGFAEKKRRKRKSRDGLDIDTLRTNH
R10         SCHCSEVGWFRVCFANMSENTLEIALKRIHEFMDRRRRF-----
           : * : * : * : * * : * . : : * * * : * : * : : * : : : :

```

Figure S1: Sequence alignment of AtACS7, PpACL1 and the chimeric protein R10.

```

AtACS7      MGLPLMMERSNNNNVELSRVAVSD---THGEDSPYFAGWKAYDENPYDESHNPSGVIQ
PpACL1      --MPMNGDTKDGEFNLKCGRTSLSTRGRRALAPFSPYIKAVNEAKKNPWSL--SNPEGYFV
R12         MGLPLMMERSNNNNVELSRVAVSD---THGEDSPYFAGWKAYDENPYDESHNPSGVIQ
           :*: : . . . : *: : . * . :*: : . * * *: : . : :*: : . * * :

AtACS7      MGLAENQVSFDLLETYLEKKNPESGMWGSKGAPGFRENALFQDYHGLKTRQAMASFMEQ
PpACL1      MATAESILSFDLVHDKIRSCREVPA-----TVGLYGNFRGGERLRNAISRMMER
R12         MGLAENQVSFDLLETYLEKKNPESGMWGSKGAPGFRENALFQDYHGLKTRQAMASFMEQ
           * . * . :*: : . : . : . * * : :*: : :*: :*: :*: :

AtACS7      IRGGKARFDPDRIVLTAGATAANELLTFILADPNDAALLVPTPYPGFDRDLRWRTGVKIV
PpACL1      TFMG--VEVDPSHICISSGVTAVLDLFFATCNPGDGLIPAPYFFAFDNDMSIRNEVIPI
R12         IRGGKARFDPDRIVLTAGATAANELLTFILADPNDAALLVPTPYPGFDRDLRWRTGVKIV
           * . . . * . :*: :*: :*: :*: :* : . * . * :*: :*: :*: :*: :* : * :

AtACS7      PIHCDSSNHQITPEALESAYQTARDANIRVRGVLITNPSNPLGATVQKKVLEDLLDFCV
PpACL1      PVQPTDTRTYIPTVHEMEEAVLAAESKGIARMLLVTNPGNPLGTLYPEATLKELLWAV
R12         PIHCDSSNHQITPEALESAYQTARDANIRVRGVLITNPGNPLGTLVQKKVLEDLLDFCV
           *: : . : : * . :*: :* . * . * :*: :*: :*: :* : . * :*: :*

AtACS7      RKNIHVLVSDEIYSGSVFHASe--FTSVAEIVE-----NIDDVSVKERVHIVYSLSKDLG
PpACL1      KRGLHVLVSDEIYANSKFGPSVDEFVSMKVTKNAVMEGLLSAETAELVHTAYGMSKDFG
R12         RKNIHVLVSDEIYSGSVFHASe--FTSVAEIVE-----NIDDVSVKERVHIVYSLSKDLG
           :*: :*: :*: :* : * :* :* :* :* :* :* :* :* :* :* :* :* :* :* :*

AtACS7      LPGFRVGTIYSYNDNVVRTARRMSSFTLVSSQTQHMLASMLSDEEFTEKYIRINRERLRR
PpACL1      MNGFRVGCLHTKNKDLEFWQNMGMFAAVSNDTQHALAIMLEDENFVDKYVKENNRRLKK
R12         LPGFRVGTIYSYNDNVVRTARRMSSFTLVSSQTQHMLASMLSDEEFTEKYIRINRERLRR
           : * * * * :*: :* . :*: :* . * :* :* :* :* :* :* :* :* :* :* :* :* :*

AtACS7      RYDTIVEGLKKAGIECLKGNAGLFCWMNLGFLEKKTKDGELQLWDVILKELNLNISPGS
PpACL1      SYELLTKSFEAANLRYMPACAAMFCWLDLKSLLTEPTFTAEDNLWKEILDECRIVLTPGQ
R12         RYDTIVEGLKKAGIECLKGNAGLFCWMNLGFLEKKTKDGELQLWDVILKELNLNISPGS
           * : : . :*: :* . : . * . :*: :* :* :* :* :* :* :* :* :* :* :* :*

AtACS7      SCHCSEVGWFRVCFANMSENTLEIALKRIHEFMDRRRRF-----
PpACL1      ACHYAEPGFFRVCYASMAPASLEIACARLTGFAEKKRRKRKSRDQLDIDTLRTNH
R12         SCHCSEVGWFRVCFANMSENTLEIALKRIHEFMDRRRRF-----
           :* :* :* :* :* :* :* :* :* :* :* :* :* :* :* :* :* :* :* :*

```

**Figure S2:** Sequence alignment of AtACS7, PpACL1 and the chimeric protein R12.
