# Supplementary material for: Domain Swapping between AtACS7 and PpACL1 Results in Chimeric ACS-like Proteins with ACS or Cβ-S Lyase Single Enzymatic Activity
Source: MDPI journal article supplement (doi:10.3390/ijms24032956), 2023-02-03
Supplement: s1 [file s1]

**Table S2.** Sequences of the primers used in this study.

| Name   | Primer sequence (5'-3')                              |
|--------|------------------------------------------------------|
| R10-AF | GGATCCATGGGTCTTCCTCTAATGATGGAGAGA                    |
| R10-AR | CTGAGTGTCGTTTGAAACTGCTGCAAACATGCCCATCCTTCTCGCTGTCCGA |
| R10-BF | ATGGGCATGTTTGCAGCAGTTTCAAACGACACTCAGCATATGCTGGCTTCTA |
| R10-BR | GCGGCCGCTCAAAACCTCCTTCGT                             |
| R12-AF | GGATCCATGGGTCTTCCTCTAATGATGGAGAGATCATCAAACAACAACA    |
| R12-AR | AAGAGTGCCCAATGGGTTCCCAGGATTAGTTATGAGCACTCCTCGGAC     |
| R12-BF | ACTAATCCTGGGAACCCATTGGGCACTCTTGTCCAAAAGAAGGTTCTAG    |
| R12-BR | GCGGCCGCTCAAAACCTCCTTCGTCCGTCCATG                    |
