# Supplementary material for: Domain Swapping between AtACS7 and PpACL1 Results in Chimeric ACS-like Proteins with ACS or Cβ-S Lyase Single Enzymatic Activity
Source: Int J Mol Sci. 2023 Feb 3;24(3):2956. doi: 10.3390/ijms24032956 (PMC9917878; doi:10.3390/ijms24032956)
Supplement: Supplementary file 1 [file ijms-24-02956-s001.zip › Table S1.xlsx]

## Sheet: Figure S1
	Figure S1
	Relative activity of ACC synthase (%)
	one-way ANOVA with Tukey's test P-value
	Tukey's multiple comparisons test	Below threshold?	Summary	Adjusted P Value			ANOVA table	SS	DF	MS	F (DFn, DFd)	P value
	NC vs. R10	No	ns	>0.9999			Treatment (between columns)	23250	4	5813	F (4, 10) = 364.9	P<0.0001
	NC vs. R6	No	ns	>0.9999			Residual (within columns)	159.3	10	15.93
	NC vs. Q98A	No	ns	0.2388			Total	23409	14
	NC vs. ACS7	Yes	****	<0.0001
	R10 vs. R6	No	ns	>0.9999
	R10 vs. Q98A	No	ns	0.2388
	R10 vs. ACS7	Yes	****	<0.0001
	R6 vs. Q98A	No	ns	0.2388
	R6 vs. ACS7	Yes	****	<0.0001
	Q98A vs. ACS7	Yes	****	<0.0001
	Relative activity of Cβ-S lyase (%)
	one-way ANOVA with Tukey's test P-value
	Tukey's multiple comparisons test	Below threshold?	Summary	Adjusted P Value			ANOVA table	SS	DF	MS	F (DFn, DFd)	P value
	NC vs. R10	Yes	****	<0.0001			Treatment (between columns)	17804	4	4451	F (4, 10) = 186.7	P<0.0001
	NC vs. R6	Yes	****	<0.0001			Residual (within columns)	238.4	10	23.84
	NC vs. Q98A	Yes	****	<0.0001			Total	18042	14
	NC vs. ACS7	Yes	****	<0.0001
	R10 vs. R6	Yes	****	<0.0001
	R10 vs. Q98A	No	ns	0.8062
	R10 vs. ACS7	Yes	****	<0.0001
	R6 vs. Q98A	Yes	****	<0.0001
	R6 vs. ACS7	Yes	****	<0.0001
	Q98A vs. ACS7	Yes	***	0.0001

## Sheet: Figure S2
	Figure S2
	Relative activity of ACC synthase (%)
	one-way ANOVA with Tukey's test P-value
	Tukey's multiple comparisons test	Below threshold?	Summary	Adjusted P Value			ANOVA table	SS	DF	MS	F (DFn, DFd)	P value
	NC vs. R12	Yes	***	0.0001			Treatment (between columns)	19402	3	6467	F (3, 8) = 35.25	P<0.0001
	NC vs. D245N	Yes	**	0.0082			Residual (within columns)	1468	8	183.5
	NC vs. ACS7	Yes	****	<0.0001			Total	20870	11
	R12 vs. D245N	Yes	*	0.0169
	R12 vs. ACS7	No	ns	0.953
	D245N vs. ACS7	Yes	**	0.0086
	Relative activity of Cβ-S lyase (%)
	one-way ANOVA with Tukey's test P-value
	Tukey's multiple comparisons test	Below threshold?	Summary	Adjusted P Value			ANOVA table	SS	DF	MS	F (DFn, DFd)	P value
	NC vs. R12	No	ns	0.945			Treatment (between columns)	22072	3	7357	F (3, 8) = 8015	P<0.0001
	NC vs.D245N	Yes	**	0.0021			Residual (within columns)	7.344	8	0.918
	NC vs. ACS7	Yes	****	<0.0001			Total	22079	11
	R12 vs. D245N	Yes	**	0.0039
	R12 vs. ACS7	Yes	****	<0.0001
	D245N vs. ACS7	Yes	****	<0.0001
